# Supplementary material for: Association between cardiovascular mortality and STOP-Bang questionnaire scores in a cohort of hospitalized patients: a prospective study
Source: PubMed Central journal article supplement — J Bras Pneumol. 2021 Jul-Aug;47(4):e20210039. doi: 10.36416/1806-3756/e20210039 (PMC8979666; doi:10.36416/1806-3756/e20210039), 2021
Supplement: 1806-3756-jbpneu-47-04-e20210039-suppl1.pdf [file 1806-3756-jbpneu-47-04-e20210039-suppl1.pdf]

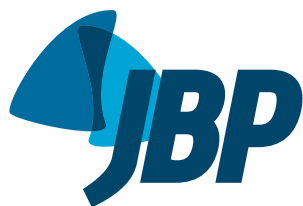

# Association between cardiovascular mortality and STOP-Bang questionnaire scores in a cohort of hospitalized patients: a prospective study

Gabriel Valdivia<sup>1</sup>, Alexia Schmidt<sup>1</sup>, Bettina Schmidt<sup>1</sup>, Francisca Rivera<sup>1</sup>, Aileen Oñate<sup>2</sup>, Camila Navarrete<sup>2</sup>, Josue Campos<sup>1</sup>, Gonzalo Labarca<sup>1,3</sup>

**Chart S1.** Definition of cardiovascular mortality.

| Cardiovascular event                       | Definition                                                                                                                                                                                                                    |
|--------------------------------------------|-------------------------------------------------------------------------------------------------------------------------------------------------------------------------------------------------------------------------------|
| Unexpected sudden death                    | Sudden death presumed to be due to ischemic cardiovascular disease occurring within 24 h after the onset of symptoms without confirmation of a cardiovascular cause and without clinical or autopsy evidence of that etiology |
| Acute myocardial infarction                | Death within 7 days of the onset of documented myocardial infarction                                                                                                                                                          |
| Congestive heart failure (CHF)             | Death due to clinical, radiological, or autopsy evidence of CHF without any clinical or other evidence of a noncardiovascular cause                                                                                           |
| Post-cardiovascular invasive interventions | Death associated with the intervention within 30 days of cardiovascular surgery or within 7 days after vascular intervention                                                                                                  |
| Documented arrhythmia                      | Death due to bradyarrhythmia or tachyarrhythmia not induced by an acute ischemic heart disease event                                                                                                                          |
| Stroke                                     | Death due to stroke occurring within 7 days after symptoms and signs of a stroke                                                                                                                                              |
| Other cardiovascular diseases              | Death due to other cardiovascular diseases, including pulmonary embolism, abdominal aortic aneurysm rupture, etc.                                                                                                             |
| Presumed cardiovascular death              | Suspicion of cardiovascular-related death with clinically supporting evidence that might not fulfill all of the abovementioned criteria                                                                                       |

**Table S1.** Clinical characteristics at baseline and reason for admission.<sup>a</sup>

| General characteristic   | Result        |
|--------------------------|---------------|
| Age, years               | 60.98 ± 17.10 |
| Male                     | 233 (53.56)   |
| STOP Bang score          | 4.02 ± 1.76   |
| ≥ 3                      | 352 (80.92)   |
| ≥ 5                      | 182 (41.84)   |
| Hypertension             | 274 (62.99)   |
| Type 2 diabetes mellitus | 166 (38.16)   |
| Dyslipidemia             | 240 (55.17)   |
| Age bracket, years       |               |
| < 40                     | 55 (12.64)    |
| 40-50                    | 58 (13.33)    |
| 51-60                    | 79 (18.16)    |
| 61-69                    | 106 (24.37)   |
| 70-79                    | 89 (20.46)    |
| ≥ 80                     | 58 (13.33)    |
| Reason for admission     |               |
| Cardiovascular disease   | 159 (36.55)   |
| Infectious disease       | 74 (17.01)    |
| Digestive system disease | 69 (15.86)    |
| Respiratory disease      | 33 (7.59)     |
| Metabolic disorders      | 29 (6.67)     |
| Rheumatological disease  | 14 (3.22)     |
| Kidney disease           | 19 (4.37)     |
| Oncology                 | 16 (3.68)     |
| Hematological disorders  | 12 (2.76)     |
| Other                    | 10 (2.30)     |

<sup>a</sup>Values expressed as mean ± SD or n (%).
